# Supplementary material
Source: publisher site journal article supplement (https://www.dovepress.com/article/supplementary_file/583960/583960_Supplementary%20Data_for_corrections_1_1.docx)
Supplement: Supplementary file 1 [file 583960_Supplementary%20Data_for_corrections_1_1.docx]

**Table S1: Modified Observer's Assessment of Alertness/Sedation (MOAA/S) Scale.**

| Score | Responsiveness Level | Operational Definition |
| --- | --- | --- |
| 5 | Alert | Responds readily to name spoken in normal tone |
| 4 | Lethargic response | Responds to name spoken in normal tone with sluggish eye |
| opening/movement |
| 3 | Responds only to loud/repeated name | Requires loud voice and/or repeated name calling to elicit response |
| 2 | Responds only to mild prodding/shake | Responds only after mild prodding or shoulder shake |
| 1 | Responds only to painful stimulus | Responds only to trapezius squeeze or another noxious stimulus |
| 0 | Unresponsive | No response to trapezius squeeze |

**Table S2: Statistical Summary of PK Parameters in Elderly Group Compared with Young Group.**

| Parameters | GLSM | | Ratio (%) | 90% CI of Ratio (%) |
| --- | --- | --- | --- | --- |
| Young | Elderly |
| Young VS. Elderly | | | | |
| Cmax (ng/mL) | 4724.5 | 4032.7 | 85.4 | (71.2, 102.4) |
| AUC0-t (h·ng/mL) | 1318.3 | 1742.6 | 132.2 | (110.6, 158.1) |
| AUC0-∞ (h·ng/mL) | 1332.4 | 1761.8 | 132.2 | (110.4, 158.4) |

GLSM: geometric least squares mean; 90% CI: 90% confidence interval.

**Table S3: Statistical Summary of PD Parameters in Elderly Group Compared with Young Group.**

| Parameters | GLSM | | Ratio (%) | 90% CI of Ratio (%) |
| --- | --- | --- | --- | --- |
| Young | Elderly |  |  |
| Young VS. Elderly | | | | |
| BIS peak | 36.89 | 33.46 | 110.25 | (101.69, 119.72) |
| BIS AUC0-t | 7591 | 7463 | 101.72 | (99.61, 104.19) |

GLSM: geometric least squares mean; 90% CI: 90% confidence interval.
